# Supplementary material for: Very-high resolution aerial imagery and deep learning uncover the fine-scale spatial patterns of elevational treelines
Source: Copernicus journal article supplement (doi:10.5194/egusphere-2024-3757), 2024-12-06
Supplement: Supplementary file [file egusphere-2024-3757-AC2-supplement.pdf]

## **Responses to Reviewer #2: RC2**

Thank you for the valuable assessment and insightful comments to the manuscript. Below, you can find the answers and explanation to all points you raised. All comments were incorporated in the revised manuscript. On behalf of the authors,

Erik Carrieri

### **General comments:**

**Reviewer#2:** You present a useful and successful approach for mapping spatial patterns in treeline ecotones. In this paper, you focus on tree positions and sizes, but I think the general methodology holds further promise for creating extended vegetation maps and terrain models as explanatory variables (a DTM was created as a necessary step to create the vegetation-height model but was not further used at this point for analysing the tree-distribution patterns, it appears).

**Response:** We thank the reviewer for the positive evaluation and constructive suggestion. As noted in the following reviewer's comment, this represents only an initial application of the generated tree maps. Assessing the influence of potential drivers on spatial patterns and processes was beyond the scope of this study, we intend to use these data as explanatory variables in future analyses to better understand the mechanisms underlying the observed patterns.

**Reviewer#2:** The paper is very well written (there are always details, see the yellow markings in the attached pdf and my comments below) and the methodology is generally clear and well presented. The graphs are informative and nicely formatted and the number of figures and tables is adequate. I have just one recommendation that may take some more analyses, and a number of minor recommendations, as listed below, but nothing that cannot be addressed.

Since I took so long to do this review (sorry for that), I can now also refer to the excellent review comments by Laurel Sindewald. I would agree that it needs to be made clearer in the introduction understanding what kind of processes require the mapping of individual trees. However, I understand this paper mainly as a methodological one, and the point pattern analysis as a first application of the results to demonstrate their usefulness. Therefore, I think that the ecological context could be kept quite short and instead the methods could be further validated:

**Response:** thanks for your positive evaluation and the careful read. We are pleased that the reviewer recognized the potential of this work, acknowledging that it is just an initial application. We agree with the reviewer and Reviewer#1 that a clearer introduction in regards of the ecological processes at the investigated treelines is needed. To address this, we have expanded the introduction in the revised manuscript.

**Reviewer#2:** It would be very interesting to see what the inaccuracy in tree detection (of different size classes, as also suggested by Laurel) means for the resulting spatial pattern metrics. This is possibly the most important criterion for deciding whether / for answering what questions the method is good enough: if the resulting point pattern analysis is very sensitive to including or excluding the missed trees (big or small), this would limit the use of the presented method for this analysis, but if it is not, then the method is good enough for such analysis in spite of some inaccuracy. Explaining why clumping / dispersion is an interesting pattern in an ecological sense (e.g. importance of facilitation vs. competition, as also suggested by Laurel) would not hurt in this context.

**Response:** We thank the reviewer for this valuable assessment. In regards of the inaccuracy in tree detection, we report here the same answer that was given to reviewer#2: In the Discussion section L380-384 we meant to highlight a limit of the deep learning model which we deemed right to emphasize. We agree with the reviewer that the lack of detection of smaller individuals right in

proximity of bigger ones might affect the PPA results. However, as it is also visible in Figure 3, the detection of small trees was possible and achieved, even when in proximity of big trees. Attached below are a boxplot and violin plot displaying the distribution of omission errors of small trees in function of the distance to medium and tall trees (distance computed as closest distance between the Ground Truth data and the border of the medium/tall crown). As the graphs show, omission errors are uniformly distributed when related to medium trees. When related to tall trees there is a concentration of missed detection on small scales (average value ~9 m), however, these scales greatly surpass the distance over which a small canopy might be obscured or hidden by a bigger one

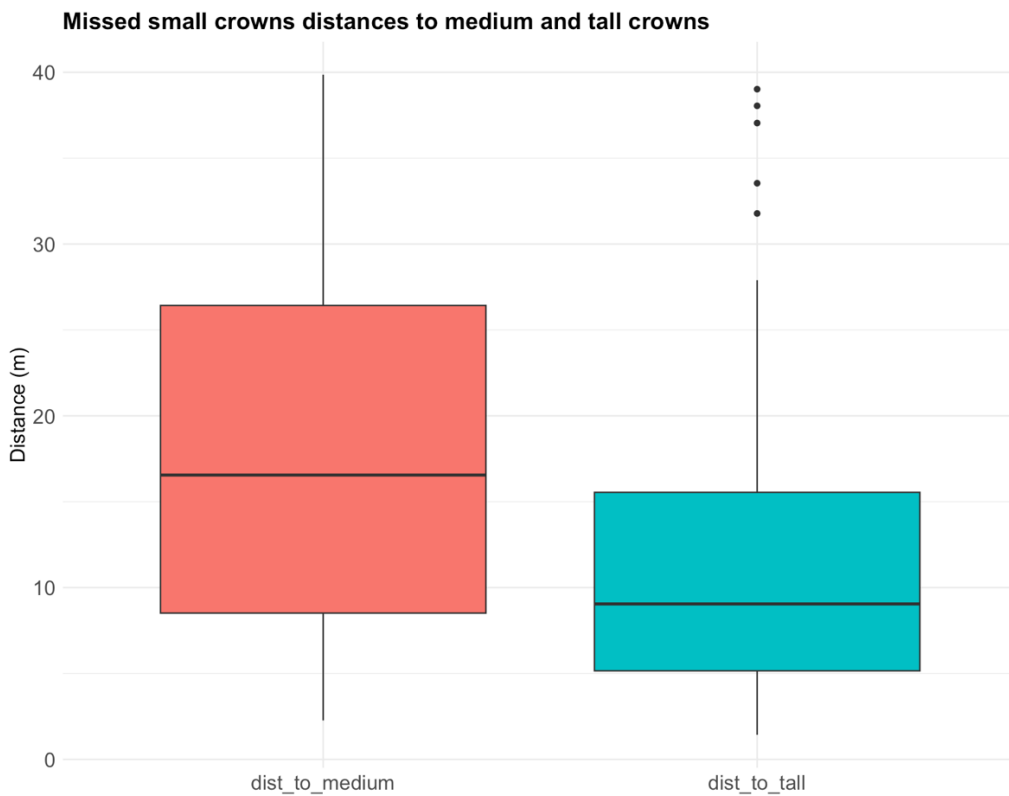

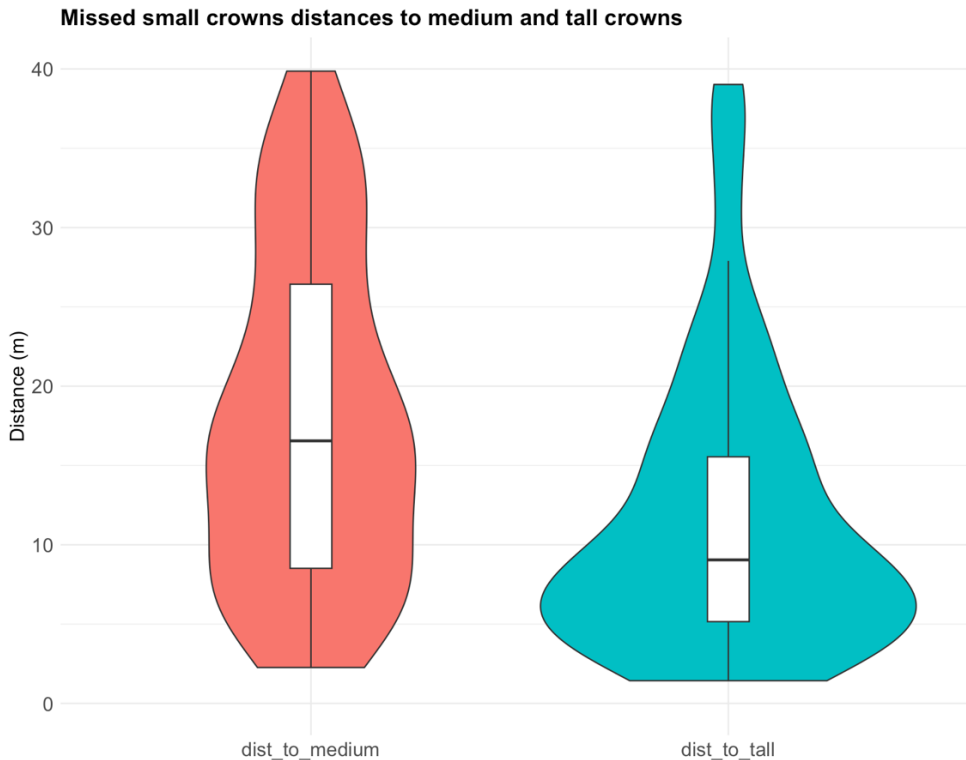

### Detailed comments:

L11-12 make clear what kind studies you are talking about and what “overall pattern” you would want to model

**Response:** thanks, we rephrased the sentence: *However, several treeline studies remain case-specific, focusing on local patterns and processes. Treelines worldwide exhibit a great variability even within single landscapes, which limits the reliability of modeled spatial patterns, and the generalizability of findings based on case studies.*

L14 the “therefore” does not logically lead to conservation...

**Response:** thanks, we have modified the sentences for better clarity. Please see above

L16 what gap?

**Response:** we changed the word “gap” with the word “limitation”: *Advancing methods to accurately map fine-scale treeline spatial patterns over large extents is crucial to overcome this limitation.*

L24 It is not clear what is meant with “tend to progressively occupy safe sites” (and the term “safe sites” does not occur anywhere else in the paper...)

**Response:** Our intention was to convey that, over time, trees tend to establish in sites with favorable conditions for growth. This trend was reflected in the PPA, which revealed within-class clustering among small, medium, and large trees. Such clustering suggests that favorable sites were colonized in successive "waves," with large numbers of seedlings establishing simultaneously in the same areas. The sentence was removed to avoid further increasing the already considerable length of the abstract.

L35-36 Citing Körner here (e.g. v would be appropriate

**Response:** thanks, we added the citation.

L42 Mienna et al. did not study carbon sequestration at all. They just mention in the introduction, like many papers do, that treeline dynamics are important for carbon sequestration, but that does not make it a suitable reference for this point.

**Response:** we apologize for the mistake and oversighting. We changed the reference to correct ones.

L43 It is very popular to claim that treelines respond sensitively to climate change, but the interesting thing about them is that some do not respond sensitively at all....

**Response:** We agree with the reviewer that there is an overexertion of the effect that climate exerts on treeline ecotones. The sentence does not imply that all the treelines respond in the same way

L48-49 this sentence is not clear.

**Response:** rephrased to “*However, understanding vegetation changes in response to the complex interplay of these drivers requires studying highly heterogeneous systems across broad spatial and temporal gradients (Holtmeier and Broll, 2007, 2017).*”

L50-51 The great spatial heterogeneity is actually a great chance in the context of understanding pattern-process relationships, because it allows us to relate many different patterns to many potential drivers. If they all looked the same it would be boring. It is not so clear here what you are aiming at with “hinders case-study observations”. What would you be trying to generalise here?

**Response:** We absolutely agree with the reviewer. With the mentioned statement we aimed at saying that the high heterogeneity found within the treeline ecotone might hinder the transferability of a process-pattern relationship found in a portion of the landscape to another portion of it (Or even more difficult would be to generalize process-pattern relationship found in a study site to other sites) because of the heterogeneity of the landscape itself. Which is an intrinsic feature of every natural system, including high-altitude ones such as the ones analyzed.

We rephrased and expanded the paragraph:

*In forest ecosystems, tree spatial distributions retain critical signatures of historical dynamics and can be used to derive insights into underlying ecological processes (Grimm et al., 2005; McIntire and Fajardo, 2009; Salazar Villegas et al., 2023). For instance, tree distribution can reveal species-specific coping strategies under stressful conditions, where positive facilitative interactions may prevail (Callaway, 1995, 1998; Smith et al., 2003). Alternatively, tree spatial patterns may encode signatures of intra- and interspecific interactions, encompassing both facilitative and competitive associations (Getzin et al., 2006; Salazar Villegas et al., 2023). Assessing these spatial association patterns among species can help to disentangle the mechanisms shaping treeline structure and dynamics. In this context, the great spatial heterogeneity observed in high-elevation ecotones provides a great opportunity to investigate pattern-process relationships. However, this same heterogeneity constrains the extrapolation of case-specific observations, thereby limiting their broader ecological generalization.*

L51 I recommend “elevation” for height of the terrain above sea level, and “altitude” for height in the air.

**Response:** Thanks for the suggestion. We have modified the word accordingly, here and in the entire manuscript

L58-59 I recommend being a bit friendlier about field data, sv

**Response:** We apologize for the overly rigid wording and have rephrased the sentence to convey a more balanced tone.

L60 The use of remote sensing dates back a lot longer, with aerial imagery available from the start of the 20<sup>th</sup> century, and ground-based remote sensing even longer!

**Response:** It is true that there is availability of aerial imagery dating back to the 20<sup>th</sup> century. However, those very pictures found their first application to treeline ecology in the late 1980s.

L63 long time periods rather than wide time intervals (the latter sounds like a low temporal resolution, which is not what you meant)

**Response:** changed

L66 Uncrewed or Unmanned?

**Response:** we aligned the acronym to “uncrewed” in all the manuscript to make it more inclusive

L68 friendly use = user-friendliness

**Response:** thank you, we rephrased: *“Their growing availability and ease of deployment make UAVs increasingly valuable for applications such as detailed tree mapping.”*

L72 Although I really like single-tree scales in treeline ecology, and it is useful and even essential for answering some of the questions, this is not the only possible or useful scale in treeline ecology.

**Response:** With the mentioned statement we did not want to devalue other scales of analysis, we aimed at emphasizing the great importance of tree-scale studies since they provide a level of detail. We rephrased the sentence and expanded the paragraph:

*Single-tree mapping approaches are crucial in treeline ecology, as they provide insights into the underlying ecological processes shaping treeline pattern and structure. Seedling establishment - a key driver of plant community dynamics - heavily depends on the presence and availability of microsites that provide suitable conditions for growth and survival (Frei et al., 2018). Multiple local factors such as topography, vegetation, and herbivory influence tree recruitment and thus mediate treeline dynamics (Elliott and Kipfmüller, 2010; Lett and Dorrepaal, 2018; Ramírez et al., 2024). Neighbouring vegetation can either hinder or enhance tree recruitment through competitive or facilitation associations (Getzin et al., 2006; Getzin et al., 2006; Salazar Villegas et al., 2023; Smith et al., 2003). Whether these interactions result in a positive or negative feedback depends on the fine-scale interplay between biotic and abiotic factors. The resulting spatial patterns at the individual tree-scale provide a valuable perspective to both infer past processes and predict future trajectories. Accurate high-resolution single-tree maps are essential tools needed to capture these fine-scale patterns and investigate such tree–tree interactions.*

L80 & L82 These are not real hypotheses. You could write “We aimed to show that...”

**Response:** changed

L85-87 Explain why mapping trees at treeline is different.

**Response:** implemented: *“[...], the distinctive species composition, stratified horizontal and vertical structure, and complex terrain characteristics of treeline ecotones confer a unique ecological identity to these environments.”*

L97-98 Are you sure there is a gradient from oceanic to continental from west to east? In the Alps the climate gradients usually vary from the outer flanks to the inner valleys, and I have never heard that the area of your eastern study sites should be oceanic. Also, the precipitation data in table 1 do not really reflect such a gradient.

**Response:** With L101-109 we aimed at stressing the high variability of features (in climate, topography, morphology, land use practices...) that can be found across the Italian Alps, since our study sites cross the mountain range almost entirely. As it is specified in L109 *“The introduction of*

*such heterogeneity in the dataset was aimed at testing the transferability of the protocol to several treeline conditions". We modified the paragraph to give a more detailed description of the studied treelines: Introducing such heterogeneity allowed us to test the transferability of the protocol to several treeline conditions. The selected treelines present elevations ranging between 2100 and 2400 m a.s.l., and variable slope aspects due to the differing orientations of the valleys. Above the closed forest, soils include both mesic and xeric regions and feature patches of grasslands, sparsely vegetated areas, scree, and surfaces shaped by gravitational events such as rill and gullies. All the selected landscapes experienced centuries of human land-use practices under varying intensities of management pressure. In general, land abandonment is more marked in the Western sector of the study area (Bätzing et al., 1996). Across all sites, the mean annual temperature ranges between 0 °C and 2 °C, while the mean annual precipitation varies from 800 mm to 1800 mm.*

L98-99 What are the implications of this northern and southern air; this is not very clear.

**Response:** As above

L99 What do these temperature ranges refer to. The study sites? But that does not fit with table 1. And it would be very warm for a treeline to have an annual temperature of 10°C, if the globally consistent SUMMER temperature at climatic treelines is around 6.4°C...

**Response:** As above

L100 The term "physiography" is unusual and imprecise. What do you mean with it exactly?

**Response:** Removed

L101-102 Here you describe the general regions, but that hardly seems relevant; I would rather expect a description of the treeline sites here

**Response:** changed as above

L102 In what sense a "sequence"?

**Response:** changed as above

L114 shown here are the entire Alps, not just the Italian Alps, right?

**Response:** changed to "the Alps"

L115 consider explaining abbreviations in figure captions to make them more self-explanatory

**Response:** added a description of CHM. We deem UAV to be broadly known as an acronym and no further explanation is needed.

Table 1: I suggest sorting the table by longitude (west to east)

**Response:** Thank for the suggestion, modified accordingly.

Table 1: were the temperatures from CHELSA corrected to correspond with the site elevation?

**Response:** CHELSA dataset already considers topographic conditions to correct for elevation and wind exposition of the valley. The data concerning temperatures and precipitations are provided just for a general description of the sites and the heterogeneity they present. Furtherly, we did not use climatic layers in the analyses, we hence believe a higher level of accuracy is not necessary.

L121 It is a bit hard to believe that your study sites were really randomly selected. Where there no considerations of e.g. accessibility?

**Response:** Changed in "*We selected ten treeline ecotones above 2,000 m a.s.l. along an east-west gradient across the Italian Alps, with a minimum distance of 25 km between sites. Site selection was*

*stratified by administrative region with only fully accessible location included, and edaphic treelines were explicitly avoided.*”

L132-133 how did starting from the middle of the plot affect the spatial resolution if the flight height was fixed relative to the highest point of the plot? And why did you choose a fixed flight height rather than following the terrain?

**Response:** We rephrased L133-L137 for clarity. Six flights in two sets of three were performed. The first set was performed at a fixed flight height of 30 from the top of the study area. The second set was performed at a fixed flight height of 30 from the middle of the study site. The ‘following terrain’ function was not yet implemented in the employed software. Concerning the spatial resolution, as mentioned in L148 the spatial resolution achieved was that of 5 cm. Images of the upper part of the flown areas presented a higher spatial resolution, but they were down sampled to the lowest resolution present in the images. The software automatically down sample the images resolution to the coarser resolution achieved in the images. Modified:

*Each UAV survey consisted of three flight paths: two of them with the camera in the nadiral position (one aligned along the contour lines and the other perpendicular), and one with an oblique camera perspective of 60° off-nadir, granting a more complete view of trees and terrain features. To mitigate spatial resolution loss in the lower portion of the plot due to the slope steepness, each set of three flights was repeated from a central position of the plot, at approximately 150 m from the plot side, resulting in a total of six flights per study site. Flight height was fixed at 30 m above the highest point of the 300 × 300 m plot for the first set and above the middle of the study site for the second.*

L134 “shade patterns from clouds”

**Response:** changed

L135 “respectively, 80 and 80%” -> “both 80%”

**Response:** corrected

L135 “ensure a comprehensive coverage of the surface” -> “to allow calculating robust structure-from-motion outputs” or something like that...

**Response:** changed

L141 What is a “ground classification”? An extraction of the ground (as in terrain) surface from the point cloud? How does this “normalise” the point cloud. For readers not familiar with this procedure, like me, this is not clear.

**Response:** We changed the sentence at L148-151. The metashape software automatically classify each point of the point clouds in “ground” or “not ground” based on a height threshold. All points with a height lower than 10 cm were classified as ground and were used to produce the DTM. Changed: *The classification of ground and non-ground points in the point clouds was based on a threshold of 10 cm height: points lower than 10 cm were considered ground and used to produce the DTM. Canopy height models (CHMs) were then produced by subtracting the DTM from the DSM.*

L142 Some readers may appreciate another definition (full name) of DSM and CHM here

**Response:** clarified

L143-144 you might want to start this sentence with “in the field work” (since you were talking about processing the point clouds and suddenly jump back to the field

**Response:** clarified

L160 the “reference data” = “dataset” how were these tiles turned into datasets exactly?

**Response:** each tile corresponds to a single image, hence, the complex of all the images is itself a dataset. For consistency, we modified the term “data” to “dataset” where it could be misleading

L161 what do you mean by “sites geographical distribution”?

**Response:** To perform a *spatial* cross-validation, data were split in training and validation datasets based on their (geographic) spatial distribution. We used all the images from 9 sites for training, and all images from the remaining site were kept outside of the training process and were used to validate the model performance (this process was repeated 10 times, leaving each study site out of the training process once). We modified L167-169 & L187-192 for better clarity: *Our methodology consisted of the following steps: i) cropping the RGB orthomosaic of each study site into adjacent tiles of 512 x 512 pixels; ii) systematically selecting 10 tiles per each study site to create the reference dataset; iii) semi-automatic classification of tree crowns; iv) hyperparameter tuning and model calibration using a dataset randomly split into training, validation, and testing subsets; v) performance evaluation; vi) validation of model transferability through spatial cross-validation.*

*And: [...]. The model trained in this way was used to perform predictions on the rest of the tiles to generate tree maps. However, this type of dataset partitioning does not guarantee model transferability since images from all sites are included in each phase of training, validation, and testing. Hence, we performed a spatial cross validation from the beginning to evaluate model generalizability. A k-fold spatial cross-validation was performed using training and validation datasets partitioned according to their geographic distribution. The dataset was partitioned into ten folds based on study sites. In each iteration, images from nine sites were used for training, while the remaining site's images were reserved exclusively for testing. This procedure was repeated across ten iterations, such that each site served as the test set once, thereby ensuring a leave-one-site-out cross-validation scheme.*

L167-169 It is not so clear to me how the “reference dataset”, created with segment-anything, relates to the ground truth through manual image interpretation. Or how the segment-anything segmentation relates to your trained DL model. Why not just use the segment-anything segmentation directly to predict tree canopies across the study areas, if you assume that that model performs better (since you use it to validate the DL model, L213-214)? In L227 you even mention a “ground-truth crown”.... Is this the manual one or the segment-anything one? This logic needs some more explanation.

**Response:** The “strong reference dataset” (composed of canopies segmented with Segment Anything software) mentioned in L167 is the “ground truth” that was created through manual image interpretation. The Segment Anything software takes as input the aerial images and displays them on the monitor. The software **does not** perform any kind of image recognition. The user is fully responsible of “manually” delineating objects (in our case: tree crowns), the software only helps the user to define the borders of the object that is clicked on (this is the reason of hyphens in “manually”, because it is not a pure manual delineation process, it is assisted). Hence, the “manually delineated crown” corresponds to the “segment-anything delineated crown” (because the software does not delineate the crowns autonomously) and were used as the “ground-truth crowns” to evaluate the model performance in terms of IoU (L213-214). Said ground truth crowns are the ones visible in Fig3a. For clarity, we have aligned the definition of the “ground truth crowns” in the entire manuscript to avoid possible misunderstanding and we changed the label of “training crowns” to “ground truth crowns” in the “image classification” section.

L174 Did the larches and the pines and spruces really have similar spectral information? That is quite surprising!

**Response:** In terms of RGB channels they do. In particular, discrimination between pines and



spruces was not possible because of the lack of specific traits in the aerial RGB images allowing for a discrimination of the species.

L207 what do you mean with the “not cross-validated results”? Those where the model was evaluated in the same site where it was trained?

**Response:** Yes. As it is clarified in the revised version, the model performance was tested two times: one time it was trained, validated and tested with a dataset made of images of all the study sites mixed together in all the three folders; another time it was trained and validated using a spatial cross validation logic to test for transferability of the model.

L225 This does not seem correct to me. Sounds to me like the MAE gives more weight to large absolute differences than to small one, but the same weight to the same difference irrespective of the relative differences, i.e. irrespective of the total height of the tree.

**Response:** clarified

L239 Why would a program for point-pattern analysis be grid based? What do you mean by this?

**Response:** thank you for the comment. It was an oversight: the software doesn't rely on a computational grid like grid computing systems, but the data it handles (point locations) can be visualized and analyzed on grids or maps. We did not use any grid based analysis. We modified accordingly

L246 Can you explain how you let the intensity vary across the study area. I.e. what did the null model look like. I guess the ecotonal gradient from forest to no trees was somehow translated into this null model. But how? Since this is important for understanding the outcome of the PPA, it would be good to explain this in the paper.

**Response:** The intensity vary across the study area accordingly to the chosen null model. The intensity map is a density plot of the observed pattern. Under the Heterogeneous Poisson (HP) null model the probability for a point to fall in an area of the plot is greater in areas where there are more trees in the observed pattern. This is different from the null model of Complete Spatial Randomness (CSR) in which the probability for a point to fall in an area of the plot is equal over all the surface of the plot.

L281 I would call this an expectation rather than a hypothesis

**Response:** changed

L298 This Wilcoxon test does not seem to be a very important result. Why did you even want to know whether these accuracies differed significantly? I think you could leave it out and just present the accuracies themselves.

**Response:** We understand the point of view of the reviewer that the mean values reported on the violin plots are enough to provide evidence to the reader of the precision achieved for the different height classes in terms of IoU, height, and position assessment. Yet, the Wilcoxon test makes the analysis more robust in that it provides an estimate of the certainty in extracting a specific metric for a specific size class (i.e. position estimation for the small and medium classes was not as accurate as the tall class one).

L305 Explain what you mean by "better"

**Response:** changed to “more accurately”

Figure 3 Explain what the orange areas are in b and d.

**Response:** explained

Figure 4 Explain abbreviation to make the figure self-explanatory. And if you start explaining what the violin plot shows, you might explain it more completely. How does a relative deviation in m work? Might this be the absolute deviation?

**Response:** figure implemented with a more explanatory caption:

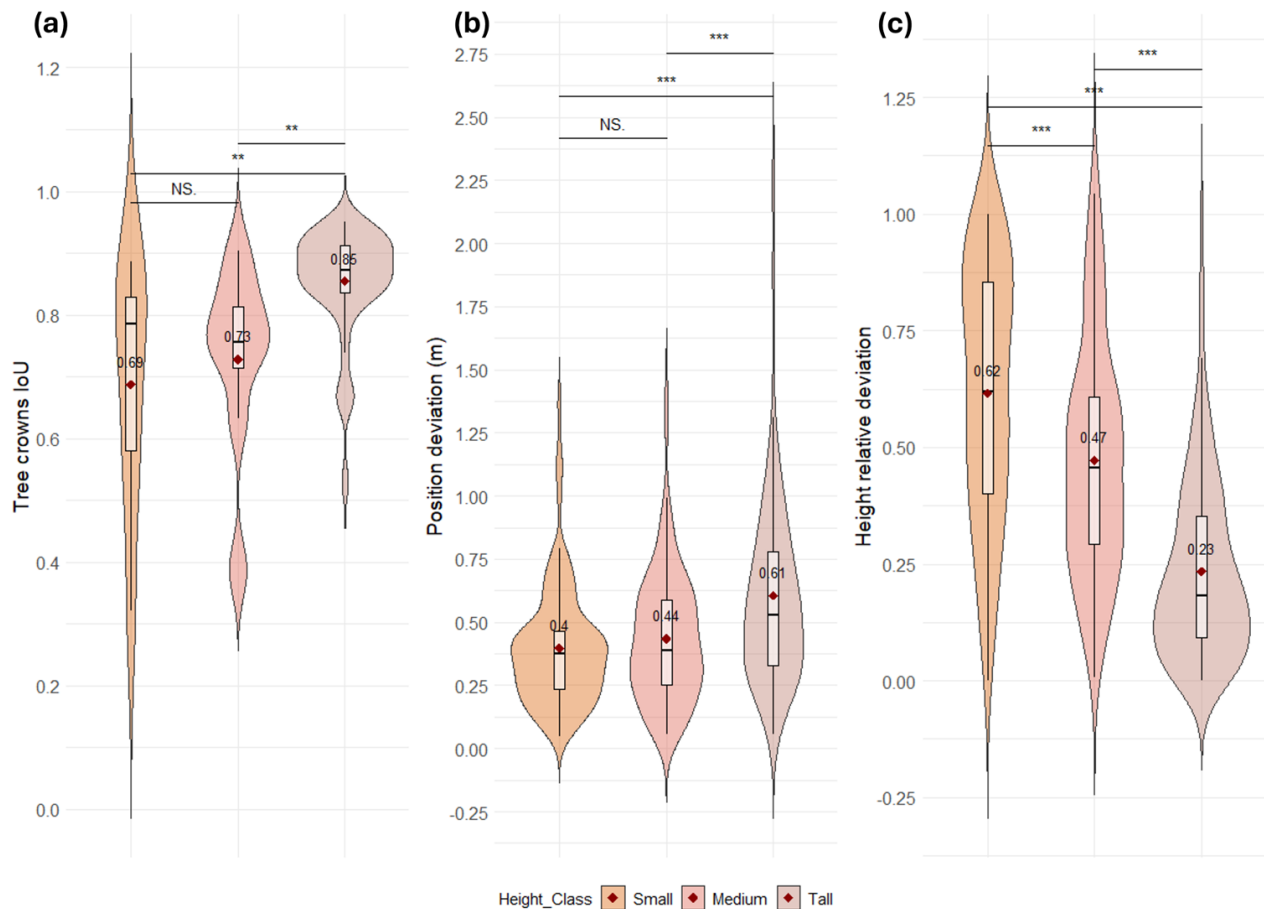

Figure 4. Comparison of model performance for three tree-height classes (Small:  $\leq 130$  cm; Medium:  $>130$  cm and  $\leq 200$  cm; Tall:  $> 200$  cm) in predicting trees (a) canopy surface and shape, measured as Intersection-over-Union (IoU) between predicted and reference crown polygons, (b) position deviation, measured as Euclidean distance (m) between predicted and reference tree centroids and, (c) height relative deviation, measured as absolute difference between predicted and reference height divided by the reference height. Violin plots width at a given value shows the kernel-density estimate of the distribution; the overlaid boxplot displays the interquartile range with the median (black line) and mean (dark-red diamonds). Statistical significance (pairwise Wilcoxon tests) is indicated as: NS = not significant; \*  $p < 0.05$ ; \*\*  $p < 0.01$ ; \*\*\*  $p < 0.001$ .

L322 & 327 clusterization & clusterized -> clustering & clustered

**Response:** modified

Figure 6 add information about the spatial scale of the images (i.e. size of the study sites) in the graph or caption.

**Response:** implemented in caption: **Figure 6.** [...] tree crowns overlapped with the 9 ha orthophoto as a background image.

Table 3 Add: Egli, & Höpke, 2020

**Response:** the mentioned paper, although interesting and outstanding, focuses on a tree species classification task. Hence, we apologize but we deem introducing said paper in table 3 would be

misleading since it does not provide results that can be compared to the listed ones (which focus on tree detection and/or tree crowns delineation)

L378-379 You might also argue that mapping and monitoring the small trees is particularly important to understand the processes going on in the ecotone. This is actually what I expected as a logical conclusion after the previous sentence...

**Response:** We modified the sentence: *Thus, while the precise mapping of small trees may be of secondary importance compared to taller, potentially permanent trees when evaluating survival rates and seed distribution, small trees are crucial when investigating the encroachment process.*

L381 First time a test of the leaf-off effect is mentioned. This should be introduced earlier.

**Response:** added in chapter 2.2

L384 First time you mention this test too....

**Response:** as above

L386 Do you mean that the detection rate was low in the cross-validation because the image looked quite different from the others due to the low sun angle causing long shadows and different colours?

**Response:** modified: *low sun angles lead to variations in canopy color and the formation of long, distorted shadows, which can significantly impair detection accuracy.*

L390 This is a very promising result. At this point, you would usually “conclude” rather than “hypothesise”, although I appreciate the caution with which this statement is made. How about “It therefore appears that ....”? This made me wonder: how did you treat *Pinus mugo*? As a small tree, or as non-tree? (please mention this somewhere). I suspect that sites with lots of *Pinus mugo* as a matrix among which trees stick out (or not) could cause particular problems. This may be worth mentioning at this point, as an opening for further research into the question of how important background vegetation is.

**Response:** thank you for the positive comment and the insightful suggestion. We modified the sentence as recommended and described how we treated *Pinus Mugo* (PM) “*Due to its low abundance and specific growth form characteristics (Table 1), dwarf mountain pine was not considered as a tree in our analyses.*”. PM presence in our study sites was very limited (see Table 1). As a consequence, it limited classification accuracy only in negligible parts of the study sites and we cannot infer on the effect that it had on tree detection and segmentation.

L394 To make this logic easier to follow, add as second sentence something like: “and some of the deviations may in fact be due to inaccuracy in the ground control data rather than the UAS images.”

**Response:** Thank you for the suggestion, implemented: *The proposed approach has demonstrated the ability to accurately georeference individual trees (RMSE = 0.59m; MAE = 0.49m) and estimate their height (RMSE = 91.6 cm; MAE = 71.8 cm); some of the observed deviations may in fact be attributable to inaccuracies in the ground control data rather than the UAV images.*

L403 Since this paragraph presents a lot of numbers, it would help if you would repeat the accuracy in m here. I am not sure that these detailed comparisons of accuracies at the cm scale is very exciting for the readers though. More interesting would be to know why the accuracies differ (whereby actually the differences are not huge and all the same order of magnitude), and why yours would be better or worse than other studies, if this can be explained by your method vs the other SfM methods.

**Response:** We agree with the reviewer this chapter may be tedious. Nevertheless, we believe a

comparison with other results achieved in literature is needed to provide the reader with a general overview of the state-of-the-art in height estimation with UAV platforms adopting different sensors. Unfortunately, an open issue of RS-based studies is the difficulty of cross-study comparisons. Due to the high quantity of parameters at play (flight height, sensors' specifics, different investigated species, different forest systems, different terrain and background features, etc...) it is arduous to compare different studies. Whereas a study was capable of detecting tree height with a worse/better accuracy than the one we achieved is stated with punctual comments in each sentence in which a study is cited. We repeated the accuracy in m as suggested. We rephrased the paragraph to make it more fluid:

*Using LiDAR, Wallace (2012) reported a mean height standard deviation of 0.24 m in a stand with sparse trees—a level of precision that clearly surpasses our results. However, when compared to studies using SfM point clouds for tree height estimation, our results demonstrate higher accuracy. For instance, Wallace et al. (2016) compared LiDAR and SfM-derived point clouds in a stand with spatially variable canopy cover, finding RMSE values of 0.92 m and 1.30 m, respectively—the latter being higher than ours. Similarly, Brieger et al. (2019) estimated tree heights in an open larch forest and reported a mean RMSE of 1.42 m, further supporting the comparatively greater accuracy of our photogrammetric approach for tree height estimation in open stands.*

L407 Instead of “as high as” a more cautious “not much worse than” may be better, since high-quality laser scanning must reach higher accuracy, and you also give such examples here yourself.

**Response:** Changed.

L422 At this detail and extent and for the Alps it may indeed be unprecedented, but I would indeed recommend toning down a little bit in this section. There are studies in the Alps on e.g. patterns of tree recruitment at different sites (e.g. Nicoud et al 2025), and there are multi-site studies about spatial pattern in e.g. the Pyrenees (e.g. cited papers by Camarero, Batllori, Guttierrez et al, or not-yet-cited papers by Ameztegui et al 2016, Birre et al 2023).

**Response:** Thank you for the references recommendations. We agree with the reviewer and with reviewer#1 that the sentence should be rephrased and toned down a bit. Rephrased as follows: *Several recent studies have highlighted how tree spatial patterns vary along an elevational gradient within the treeline ecotone (Garbarino et al., 2020; Jia et al., 2022; Wang et al., 2021). Other works have investigated tree recruitment at different sites at broad spatial scales (Nicoud et al., 2025), and others investigated spatial patterns on multiple sites in the Pyrenees (Birre et al., 2023). However, to the best of our knowledge, there are no previous studies that have simultaneously investigated the patterns of multiple treelines at the same level of spatial extent (90 ha) and resolution (5cm) as presented in this work.*

L426 The pattern is very different between point and polygon metrics, it is clearly not just an effect of a different range of significance (which, if I understand it correctly, would only result in a wider confidence interval around the null model).

**Response:** We understand the reviewer's confusion in regards of the plot differences. However, we have also contacted Wiegand Thorsten for assistance and he gave an explanation as the one reported in the paper. Essentially, having larger objects in the observation window leads to a greater clustering because of the larger space occupied by each individual. Larger objects (crowns) result in larger clustering if compared to point approximation (centroids) because in some cases the observation window will be almost fully occupied by the objects (crowns).

L429 With “systematic effect” you mean “methodological bias” or something like that?

**Response:** changed

L438 Please explain “active niche selection” for trees (both the “active and the “niche” part)

**Response:** we agree with the reviewer the word “niche” is inappropriate. Changed: *The aggregation patterns found underpin this hypothesis showing that seedling preferentially establish in microsites with better conditions.*

L451 This conclusion may need some more thought. How do you imagine competition may work across 50m? May this “repulsion” relate to a large-scale gradient from established forest at one end of the gradient to recruitment at the other end, or is this taken care of in the null model (please see my previous comment about explaining the handling of the gradient in the null model)?

**Response:** We thank the reviewer for this thoughtful observation. The potential effect of the large-scale gradient is indeed accounted for in the null model used. *“This null model distributes the points (tree centroids from the tree maps) on the study area with a probability proportional to the intensity map but relaxes the assumption of complete spatial randomness and allows the intensity of the point pattern to vary across the study area.”* As explained in a response to a previous comment:

*The intensity vary across the study area accordingly to the chosen null model. The intensity map is a density plot of the observed pattern. Under the Heterogeneous Poisson (HP) null model the probability for a point to fall in an area of the plot is greater in areas where there are more trees in the observed pattern. This is different from the null model of Complete Spatial Randomness (CSR) in which the probability for a point to fall in an area of the plot is equal over all the surface of the plot.*

Hence, the model incorporates the underlying spatial heterogeneity, including the gradient from established forest to recruitment zones, ensuring that the observed pattern of repulsion is not an artifact of this gradient but rather reflects a deviation from the expected distribution under such spatial structure.

L467-469 Using good training data, VHR images can also distinguish tree species even if they are RGB or monochromatic, since species have different crown shapes. This may be worth mentioning here too (i.e. the investment can be either in better sensors or in better training data, depending on whether one has more money or more time available).

**Response:** implemented: *Alternatively, species-level analyses are also possible with very-high-resolution RGB images acquired through low-elevation UAV flights achieving a very fine ground sampling density (~ 1.6 cm/px (Egli and Höpke, 2020)), as they can reveal species-specific crown architecture and morphology.*

L487 ... on the ground or by expensive aerial surveys or lower-resolution, lower-quality and more expensive satellite imagery.

**Response:** thank you for the comment, changed: *The present work underpins the possibility of using UAVs to advance treeline research, bridging the gap left by limited-in-scale and labor-intensive field surveys and less accurate satellite imagery.*
